# Supplementary material
Source: Springer Nature journal article supplement (https://www.springermedizin.de/resource/supplementary/13012_2010_306_MOESM7_ESM.pdf/9629682)

**Motor Growth Curves: Familiarity -- East**

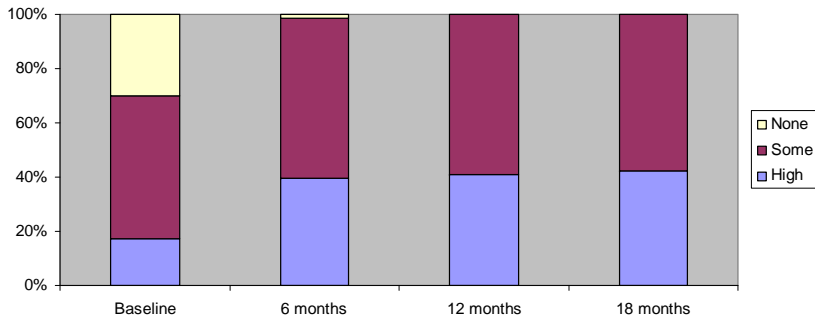

**Motor Growth Curves: Use -- East**

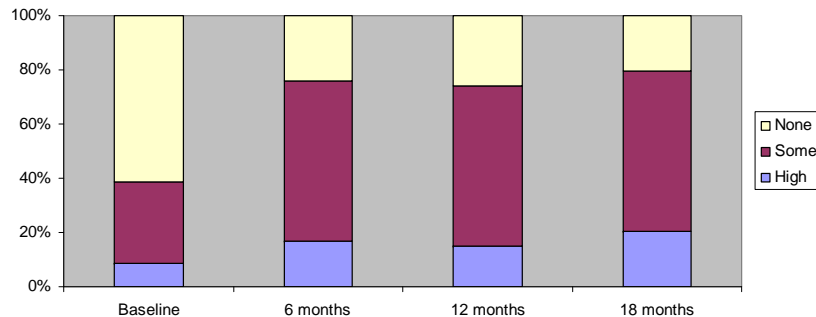

**Motor Growth Curves: Familiarity -- West**

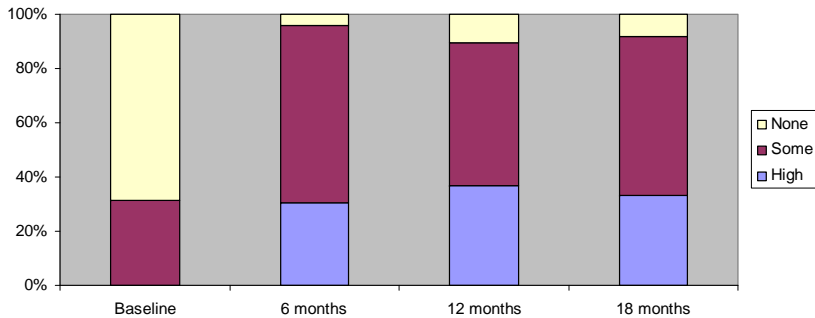

**Motor Growth Curves: Use -- West**

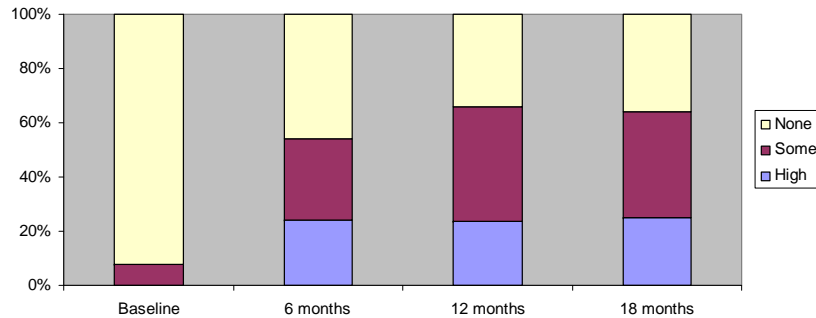

Supplement: MOESM7 [file 9629682]
